# Supplementary material for: Symbiosis Specificity of the Preceding Host Plant Can Dominate but Not Obliterate the Association Between Wheat and Its Arbuscular Mycorrhizal Fungal Partners
Source: Front Microbiol. 2018 Nov 27;9:2920. doi: 10.3389/fmicb.2018.02920 (PMC6277769; doi:10.3389/fmicb.2018.02920)
Supplement: Supplementary file 2 [file Data_Sheet_2.xlsx]

## Sheet: Table S2
Table S2. GenBank accessions, taxonomy, counts, and sequences of representative OTUs found in soil and in roots of Ornithopus compressus, Lolium rigidum and Triticum aestivum
OTU#	GenBank accession #	Best hit NCBI accession #	Cover, Indentity	Family	Genus or species	Soil_4	Soil_5	Soil_6	Soil_10	Soil_11	Soil_12	Soil_16	Soil_17	Soil_18	Orn_4	Orn_5	Orn_6	Lol_10	Lol_11	Lol_12	Lol_16	Lol_17	Lol_18	Orn_16	Orn_17	Orn_18	W_1	W_2	W_3	W_4	W_5	W_6	W_7	W_8	W_9	W_10	W_11	W_12	W_13	W_14	W_15	W_16	W_17	W_18	Sequence
OTU_1	MG774934	LT855293	100%, 100%	Glomeraceae	Uncultured glomeraceae	1164	0	20282	1185	12726	595	0	1511	2287	729	258	175	144	786	295	498	2783	4166	548	242	340	42	130	92	270	464	414	131	650	607	173	20	683	482	279	432	483	1459	1215	TGTAATCGCGTTCTAACCTGTTGACCGTCAACTTAAATAGCCGTAAGCACGCTTTCGGCACCTAAGCAACTTTCAGAGGTCAGACGGATAGCCCAGAAGGGTATTCGTTGCAATCCTCAGTTTCGGTCACCGCATCTACCAGAGGCTATAACACTTCAATACGAGATCGAAGCTACATTCCTCCGATCATTTTACGGTGATCGAAACTGACGTTGGCCTACCATACGAAAAAGTACACCCCAAAAGCACAAACATTGCAAACAGCGAGGCCCGTTAAAGACTCACGCAC
OTU_2	MG774935	AY639345	100%, 100%	Claroideoglomeraceae	Claroideoglomus sp.	0	0	0	0	0	9213	0	1436	191	30	80	385	1492	421	350	1327	77	0	596	178	181	583	259	5079	695	214	230	2946	5271	1044	437	243	873	722	169	2062	146	431	215	TTTGCTCACACTCTAACCTGTTCAAAGGCGAATCCTAACGACGTCAGCAAGCTGTCGTCACCAGGATACCAAAGAGAAGCCAGGTGGAACAGCCCTAAAGGTATTCGTTGCAATCCTCAATCCCGATCACCACATTCCGCTAAAGGTTATAACACTCCCGAAGGAGCCACATCCCTCCAGCCTTTTTATGACGTTCGAAATTGATGTTAACCAGCGGACACGAAAGTGCTCCCCCTCATCGTGAGACACATGCTGTGGCGGTTTTGAGGCTCGCCACAACATGGGTCTC
OTU_3	MG774936	AY639343	100%, 99%	Claroideoglomeraceae	Claroideoglomus sp.	0	0	0	0	0	3418	0	960	0	110	38	147	732	1336	506	446	366	1319	173	228	214	1110	117	1975	467	231	60	3199	3172	575	1035	124	883	804	115	1497	1045	626	326	TTTGCTCACACTCTAACCTGTTCAAAGGCGAATCCTAACAACGTCAGCAAGCTGTCGTCACCAGGATACCAAAGAGAAGCCAGGTGGAACAGCCCTAAAGGTATTCGTTGCAATCCTCAATCCCGACCACCACATTCCGCTAAAGGTTATAACACTCCCGAAGGAGCCACATCCCTCCAGCCTTTTTATGACGTTCGAAATTGATGTTAACCAGCGGACACGAAAGTGCTCCATTTCACCAAGAGTTCACGCTTCGTGACGGTTTTGAGGCTCGCCACGCCATGTGATC
OTU_4	MG774937	AB914598	88%, 94%	Glomeraceae	Uncultured glomeraceae	1819	2174	1	1618	3639	838	1393	0	745	0	1	10	0	14	0	0	0	0	0	0	0	0	0	0	0	1	0	0	0	0	0	0	17	0	22	0	0	1	0	CTTACGATCGCTCTTTCTTATTGCCCACCCGCCCTAACACTGTAAGATACTCTTGCAATGAAAGGGTAGCGACCAGAAGAAAGCCGACTAGCCCACCCGAAGATAGGTGTCCGCTGCACTCCTCGGTCCCAAAGATCGCATCCATGGCTGCCTATAACACCCCCGAAGGGGCCACATTGCTGCCATTCTTTTACGACCCTCAAAACCGATGCTGACCTGCCCTACGCAAAAGTGCACCAGTAGAATGGATGCAACATAGTCCACCTATTCTACTAGCTGATTTTACGCC
OTU_5	MG774938	AB913032	100%, 99%	Glomeraceae	Uncultured glomeraceae	0	0	0	4015	0	0	0	0	0	113	134	35	0	752	3024	742	359	0	735	39	146	403	253	348	42	462	133	0	57	290	0	132	80	86	31	600	151	379	0	TGTAATCACGTTCTAACCTTTTGACCGTCAACTTAAATGGCCGTAAGCAAGCTTTCGACACCCAAGTAACTTTCAGAGGTCAGACGGATAGCCTAAAAGGTATTCGTTGCAATCCTCGGTCCTAATCACCACATTTACCAAAGGCTATAACACTTCAACCGAAGTCGAAGCTACATTCCTCCGATCATTTTATGGCGATCAAAACCGACGTTGACCTACCATACGAAAAAGTACACCAAAGAAACATACATATTGCAAACAATGAAGATCTCATACGCCCACAAATGCA
OTU_6	MG774939	LN624111	100%, 100%	Glomeraceae	Rhizophagus invermaium	0	138	0	408	0	174	0	205	169	87	109	653	71	45	223	1001	229	244	800	116	86	62	187	265	398	244	158	31	286	142	250	21	379	132	282	263	465	726	197	TTTAACCCGTTCTAACCTTTTGAAAATCACTTTCGATGACCGTAAGCACGCTTTCGGCACCGGAGCAACCTTCAGAGATCAGACGGGTAGCCCCCGAAGGGGTATCCGTTGCAATCCTCAATCCCAATCGTCACATCTACCAGAGTCTATAACACTTCGATACGAGACCAAAGCTACATTCCTCCAATCATTTTATGACGACCGAAATTGATGTTAACCCACCACACGGACAAGTACACCAAATGTGCACGAATATGCAAAACATGAAGGCGGTTAAGCTCCTCACGCC
OTU_7	MG774940	FJ820862	100%, 100%	Glomeraceae	Uncultured glomeraceae	0	0	0	0	0	3107	1	0	2046	131	180	577	432	84	723	0	181	1259	409	73	141	333	82	187	1019	430	299	1655	1040	333	296	36	1539	97	465	808	1364	3610	1847	TTAATTCACTTTCTAATCTATTTGCTAACTAATTCAAACAACAAAAGCAAGCTGTTGCTATCTGAACGTCAACAAGAGACCAGACGGAACTGCCCTAAAGGTATTCGTTGCAAACCTCAATCCCAATCGCCACATTCCGCTAAGGGTTATAACACTCCCGAAGGAGCCACATCCCCTTAACCTTTTTATGACAATCAAAATTGATGCTAACCAGCAGACAACAAAGTACACGGAAAACGAAAGCAATAAATTACTAACGCTACCCGCTGAGTTGATGACTGCACGACTG
OTU_8	MG774941	HG969388	100%, 100%	Glomeraceae	Rhizophagus invermaium	0	0	0	0	0	55	0	0	38	39	30	388	39	34	128	422	117	157	343	33	23	26	49	131	173	88	82	5	139	60	94	4	155	54	97	88	202	248	109	TTTAACCCGTTCTAACCTTTTGAAAATCACTTTCGATGACCGTAAGCACGCTTTCGGCACCGGAGCAACCTTCAGAGATCAGACGAGTAGCCCCGAAGGGTATCCGTTGCAATCCTCAATCCCAATCGTCACATCTACCAGAGTCTATAACACTTCGATACGAGACCAAAGCTACATTCCTCCAGTCATTTTATGACGACCAAAATTGATGTTAACCTACCACACGGGCAAGTACACCCAAGAGCACGAATACGTAAAACATGAGGGTGATTAAACTCCTCACAATCCA
OTU_9	MG774942	AJ459325	100%, 99%	Acaulosporaceae	Acaulospora sp.	0	0	59	0	0	3	0	0	0	293	362	798	22	67	12	25	10	539	1257	643	484	402	587	371	17	5	14	36	72	7	12	0	13	1027	260	1477	0	11	2	AAATGAATCACTCTAACATCTAGACAATCGAGTCCCACTAACGTCAGCGAGCTGTCGAAAGCGGGGTAACCGTCAGAAGCCAGGTGACCAGCCACAAGGGTATCCGCTGCAATCCTCAATCCCGGTCACCACATAGATCAAGGTCTATAACACTTTTCCGAAGAAAAGCCACATTCCCTCAAATTTTTTATGATAACCGAAATTGATGCTAACCTGCCGAGTGAGGAAGTGCACCGGAAAGTACGCGAGCGAACCCACACACCATCAAGTTGATTCCCCACTAGCATGA
OTU_10	MG774943	AB710220	100%, 99%	Glomeraceae	Uncultured glomeraceae	0	0	0	0	0	0	0	0	0	171	59	47	207	813	1	580	0	0	175	8	186	111	39	28	0	64	93	2	33	124	76	2	148	331	78	142	742	280	0	TTTAATCCGTTCTAACCTTTTGACCGAACGCTTCAACATCGTAAGCAAGCTTTCGACGCCAAAGTGTCGTATCAGAGGCCAGACGAATAGCCCGTTAGGGTATCCGTTGCAATCCTCGGTCCCGACAGTTACATCTACCAAAGGTTATAACACTTCAATCGAAATCGAAGCTACATCCCTCCGATCATTTTATAACGGTCGAAACCGATGCTAACCTACAAACACGAGAAAGTGCACCAAAAGAACGCGAATGCCGGGAGAAACAAAGGCTCTTTGAAACCCCACGTTA
OTU_11	MG774944	AB665502	100%, 98%	Glomeraceae	Uncultured glomeraceae	0	0	0	0	0	0	0	0	0	0	0	0	0	13	0	0	0	5	2833	139	48	0	0	0	0	0	0	799	43	0	0	0	0	83	3	0	0	0	44	TTTAATCCGTTCTAACCTTTTGACCGTACACTATAATACCATAAGCACGCTTTCAGCACCATAGTGACATGTCAGAGGCCAGGCGGATAGCCCATGAGGGTATTCATTGCAATCCTCGATCCCTCCCGTTACATCTACCAAAGGCTATAACACTTCAATACGAGATCGAAGCTACATTCCTCCAGTCATTTTATAACGGTTGAAACCGATGTTGACCTACAATACGAGAAAGTACACCCAAAAAAAGCAGGTTGTGAAAAACAAAGGCACTCTGAATCCCACAAGTCCA
OTU_12	MG774945	KP728602	100%, 100%	Glomeraceae	Uncultured glomeraceae	24	90	0	0	0	0	0	77	41	13	29	204	24	29	13	59	20	33	75	38	5	23	68	73	38	145	24	10	117	19	39	2	59	28	63	13	7	255	32	TTTAACCCGCTCTAACCTTTTGAAAATCACTTTCGATGACCGTAAGCACGCTTTCGCCACCGGAGCAACCTTCAGAGATCAGACGGGTAGCCCCGAGGGGTATCCGTTGCAATCCTCAATCCCAATCGTCACATCTACCAGAGGCTATAACACTTCGATACGAGATCAAAGCTACATTCCTCCAATCATTTTATGACGTCCGAAATTGATGTTAACCTACCACACGGGCAAGTACACCCAAGAGCACGAATATGCAAAACATGAGGGTGATTAAACTCCTCACAATCCA
OTU_13	MG774946	FM876793	100%, 99%	Acaulosporaceae	Acaulospora sp.	0	0	122	0	82	0	0	0	0	79	76	121	9	13	29	7	3	38	274	90	166	2	25	80	62	52	104	1	46	30	45	2	78	6	10	13	13	79	197	AATCAATCACTCTGACATCTAGACAATCGAGTCCCACCGATGTTAGCGAGCTATCGAAGGCGGGGTAACCGTCAGAAGCCAGGTGACGAGCCACGAGGGTATCCGCTGCAATCCTCAATCCCGGTCACCACATAGATCAAGATCTATAACACTTTTCCGAAGAAAAGCCACATTCTCTCAAATTTTTTATGATAACCGAAATTGATGCTAACCTGCCGGGTGAGAAAGTGCACCAGAAAGTACGAGGGAGAACCCACACACCATCAGGTTGATTCCTCACTAGCATGAC
OTU_14	MG774947	KP728534	100%, 99%	Glomeraceae	Uncultured glomeraceae	0	0	0	0	0	0	0	0	690	36	77	450	0	213	454	0	0	0	450	113	110	139	40	40	258	113	126	94	125	290	98	24	305	15	38	106	108	1418	384	TTAATTCACTTTCTAATCTATTTGCTAACTAATTCAAACAACAAAAGCAAGCTGTTGCTATCTGAACGTCAACAAGAGACCAGACGGAACTGCCCTAAAGGTATTCGTTGCAAACCTCAATCCCAATCGCCACATTCCGCTAAGGGTTATAACACTCCCGAAGGAGCCACATCCCCTTAACCTTTTTATGACAATCAAAATTGATGCTAACCAGCAGACAACAAAGTACACGCTAGCATAGCTGAAATTTACAGGATGGCGGTTTTGACACTCGCCATCGGGTAAATTT
OTU_15	MG774948	KX643966	99%, 96%	Glomeraceae	Uncultured glomeraceae	0	0	0	0	0	0	0	0	0	120	0	37	0	0	0	0	0	510	0	0	0	75	0	0	82	19	10	35	73	0	0	16	29	0	0	50	2	97	57	TGTAATTACGTTCTAACCTATTGACCGTTAACTTAAATAACCGTAAGCATGCTTTCGGCACCTAAGCAACTTTCAGAGATCAGACGAATAGCCCGAAGGGTATTCGTTGCAATCCTCAGTATCAATCACTACATCTACCAGAGGCTATAACACTTCAATACGAGATCGAAGCTACATTCCTCCAGCCATTTTATAGCGACCAAAACTGATGTTGGCCTACCATACGAAAAAGTACACCCAAAAAGCACAAACGTTGCAAACAGCGAGGTTTTAAAGCTCACACACGCCC
OTU_16	MG774949	HF970250	100%, 99%	Glomeraceae	Funneliformis sp.	0	0	0	0	0	0	0	0	0	0	2	0	0	0	0	0	0	0	0	135	65	0	0	0	0	0	0	0	0	0	0	0	0	0	6	16	0	1606	0	TCTAATCCGTTCTAACCTTTTGACCGTAATACCCTAACATCATAAGCAAGCTTTCAACATCAAGGCAACGTATCAGAGATCAGACGAATAGCCCTTGAAGGGTATCCGTTGCAATCCTCGGTCTCAAACATCACATCTACCAAAGGCTATAACACTTCAATACGAGATCGAAGCTACATTCCTCCAGTCATTTTATGACATTCAAAACCGATGTTGACTAACCGTACGAAAAAGTACACCGAGAGATCCCAATCTAGCGAATCCGAAGGCTTTGAAACTCTTCAAAACC
OTU_17	MG774950	KX643966	100%, 96%	Glomeraceae	Uncultured glomeraceae	0	0	0	0	0	0	0	0	0	0	152	537	199	0	0	0	0	0	152	224	0	360	98	0	0	15	71	108	297	59	47	63	366	0	0	33	13	220	215	TATAATCTCGTTCTAACCTATTGACCGTCAACTTAAATAGCCGTAAGCACGCTTTCGGCACCTAAGTAACTTTCAGAGGTCAGACGGATAGCCCAAAAGGTATCCGTTGCAATCCTCAGTATCAATCACCACATCTACCAAAGGCTATAACACTTCAATACGAGATCGAAGCTACATTCCTCCGGTCATTTTATAGCGACCAAAACTGATGTTGGCCTACCATACGAAAAAGTACACCCAAAAAGCACAAACATTGCAAACAGCGAGGGTTTAAAGCTCACACACGCCC
OTU_18	MG774951	JF439169	100%, 100%	Glomeraceae	Rhizophagus intraradices	0	0	0	0	0	0	0	0	0	34	38	183	33	76	50	237	57	0	71	40	6	0	25	6	141	15	7	138	117	38	3	0	0	169	18	4	19	168	4	TTTAACCCATTCTAACCTATTGACCATCGACTTTGATAACCGTAAGCAAGCTTTCGGCACCAGAGCAACAATCAGAGATCAGACAGGTAGCCCCGAAGGGTATCCGTTGCAATCCTCAATCCCGATCGTCACATCTACCGAAGGCTATAACACTTCAATACAAGATCGAAGCTACATTCCTCCAGCCATTTTATGACCACCAAAATTGATGTTAACTTACACACGGGCAAGTACACCCAAAGTGCACGAATATGCAGGCATGAAGGCGTTTAACTCCTCACGCTCCACA
OTU_19	MG774952	HM485773	100%, 96%	Claroideoglomeraceae	Claroideoglomus sp.	0	0	0	0	0	0	0	0	0	0	0	0	0	574	0	0	0	0	0	0	0	0	14	13	0	0	0	8	8	0	0	0	14	253	0	0	0	0	0	TTTGCTCACACTCTAGCCTGTTCAAAGGCGAATCCTAACGACGTCAGCAAGCTGTCGCCACCAGGATACCAATGAGAAGCCAGGTGGAACAGCCCTAAAGGTATTCGTTGCAATCCTCAATCCCGACCACCACATTCCGCTAAAGGTTATAACACTCCCGAAGGAGCTACGTCCCTCCAGCCTTTTTATGACGTTCGAAATTGATGTTAACCAGCGGACACGAAAGTGCTCCCCTCACCTAGACTTCGCGCTTCGTGACGGTTTTGAGGCTCGCCACGCCGCGTGACCT
OTU_20	MG774953	HG969389	100%, 100%	Glomeraceae	Rhizophagus invermaium	0	0	0	0	0	86	0	0	0	14	24	109	7	7	50	71	37	51	65	11	9	11	28	45	86	22	19	2	37	25	39	6	43	17	31	37	66	92	30	TTTAACCCGTTCTAACCTTTTGAAAATCACTTTCGATGACCGTAAGCACGCTTTCGGTACCGGAGCAACCTTCAGAGATCAGACGAGTAGCCCCGAAGGGTATCCGTTGCAATCCTCAATCCCAATCGTCACATCTACCAGAGTCTATAACACTTCGATACGAGACCAAAGCTACATTCCTCCAATCATTTTATGACGACCGAAATTGATGTTAACCTACCACACAGACAAGTACACCCAAGAGCACAAATATGCAATACATGAAGGCGGTTAAACTCCTCATAAACCA
OTU_21	MG774954	LT622174	99%, 98%	Glomeraceae	Uncultured glomeraceae	0	0	0	0	0	0	0	0	0	57	2	0	0	260	0	143	0	0	0	0	0	0	22	12	0	12	6	7	32	122	0	0	68	80	12	42	169	51	0	TTTAATCCGTTCTAACCTTTTGACCGAACGCTTCAACATCGTAAGCAAGCTTTCGACGCCAAAGTGTCGTATCAGAGGCCAGACGAATAGCCCGTTAGGGTATCCGTTGCAATCCTCGGTCCCGACAGTTACATCTACCAAAGGTTATAACACTTCAATCGAAATCGAAGCTACATCCCTCCGATCATTTTATAACGGTCAAAACCGATGCTAACCTACAAAACGAGAAAGTGCACCAAAAAAACGCGAATATCGCAAGGACAAAGGCTCTTTGAATCCTACGAATCCA
OTU_22	MG774955	HE775316	100%, 99%	Glomeraceae	Rhizophagus sp.	0	0	0	0	0	0	0	98	60	8	6	32	6	0	11	21	3	0	3	8	4	17	10	17	7	51	8	4	27	13	3	1	10	14	17	5	3	50	6	TTTAACCCGTTCTAACCTTTTGAAAATCACTTCCGATAACCATAAGCACGCTTTCAGCACCGGAGTAACCTTCAGAGATCAGACGGGTAGCCCCGAGGGGTATCCGTTGCAATCCTCAATCCCAATCGTCACATCTACCAAAGGCTATAACACTTCGATACGAGATCAAAGCTACATTCCTCCAATCATTTTATGACGTCCGAAATTGATGTTAACCTACCACACGGGCAAATACACCCAAGAGCACGAATATGCAAACCATGAGGGTGATTAAACTCCTCACAATCCA
OTU_23	MG774956	KM879491	100%, 100%	Glomeraceae	Rhizophagus sp.	0	0	0	0	0	0	0	0	0	2	0	51	20	0	5	8	0	0	4	0	0	15	46	6	15	3	16	10	17	6	2	1	48	32	13	10	0	0	16	TTTAACCCGTTCTAACCTTTTGACCATCGACTTTGATAACCGTAAGCAAGCTTTCGGTACCAGAGCAACGATCAGAGATCAGACAGGTAGCCCCGAAGGGTATCCGTTGCAATCCTCAATCTCGATCATCACATCTACCGAAGGCTATAACACTTCAATACGAGATCGAAGCTACATTCCTCCAGTCATTTTATGACCACCAAAATTGATGTTAACCAACCATACGGGCAAGTACACCCAAAGTGCACGAATATACAGGCATGAAGGCGTTTAACTCCTCACGCTCCAC
OTU_24	MG774957	HF970310	100%, 98%	Glomeraceae	Funneliformis geosporum	0	0	0	0	0	0	0	0	0	0	0	0	459	0	0	0	0	0	0	0	0	0	0	0	0	0	0	0	0	0	0	0	0	0	0	0	0	0	0	TTTAATCCGTTCTAACCTTTTGACCGTAATACCCTAACATCATAAGCGAGCTTTCGACATCAAGGCAACGTATCAGAGATCAGACGAATAGCCCAGAAGGGTATCCGTTGCAATCCTCGGTCTCGAACATCACATCTACCAAAGGTTATAACACTTCGATACGAGATCGAAGCCACATTCCTCCAGTCATTTTATGACATTCAAAACCGATGTTGACTAACCGTACGAGAAAGTACACCAATGGAGCCCAATCCTCGCAAATCCGAAGGCTTTTAAAACTCCTCGAAAC
OTU_25	MG774958	AY541832	100%, 98%	Claroideoglomeraceae	Claroideoglomus etunicatum	0	0	0	0	0	0	0	0	0	122	0	18	0	0	0	53	0	0	41	5	80	26	32	40	22	0	0	19	64	49	0	2	49	264	101	40	0	185	71	TTTGCTCACACTCTAGCCTGTTCAAAGGCGAGTCCTAACGACGTCAGCAAGCTGTCGTCACCAGGATACCAATGAGAAGCCAGGTGGAACAGCCCTAAAGGTATTCGTTGCAATCCTCAATCCCGAACACCACATTCCGCTAAAGGTTATAACACTCCCGAAGGAGCCACGTCCCTCCAGCCTTTTTATGACGTTCGAAATTGATGTTAACCAGCGGACACGAAAGTACTCCCTCTCATCGGAGATCACACGCTGTGGCGGTTTTGAGGCTCGCCACAGCATGTGATCT
OTU_26	MG774959	JF439101	100%, 100%	Glomeraceae	Rhizophagus intraradices	0	0	0	0	0	0	0	0	0	7	9	29	12	8	4	58	10	5	39	15	1	0	15	1	42	2	0	36	20	29	0	0	0	43	3	1	4	46	0	TTTAACCCATTCTAACATATTGACCATCGACTTTGATAACCGTAAGCAAGCTTTCGGCACCAGAGCAACGATCAGAGATCAGATAGGTAGCCCCGAAGGGTATCCGTTGCAATCCTCAATCTCGAAAACCACATCTACCGAAGGCTATAACACTTCAATACGAGATCGAAGCTACATTCCTCCAGTCATTTTATGGCGTCCAAAATTGATGTTAACCAACCACACGGGCAAGTACACCCAAGAGCACGAATATGCAAAACGTGAAGGCGTTTAACTCTTCACACCCCAC
OTU_27	MG774960	AB547176	100%, 99%	Glomeraceae	Uncultured glomeraceae	0	0	0	0	0	0	0	0	0	9	6	154	0	10	0	60	14	13	179	9	7	24	22	35	12	5	12	31	75	25	87	1	54	52	64	48	23	110	12	TGTAATCGCGTTCTAACCTTTTGACCGCCAACTAGAATGTCATAAGCACGCTTTCGACACTCGAGCGACTTTCAGAGGTCAGACAGATAGCCCAAAGGGTATTCGTTGCAATCCTCGATCCCAATCGTCACATCTACCAAAGGCTATAACACTCCGATACGAGATCGAAGCCACATTCCTCCGATCATTTTATGACGATCAAAATCGATATTGACCTACCATACGGAAAAGTGCACAACAAAAGTACCATAACGCAAAGCAACGAAGGCCGCGAAGCTCAACGTCACCC
OTU_28	MG774961	KP191471	100%, 99%	Acaulosporaceae	Acaulospora ignota	0	0	0	0	0	0	38	54	2	41	42	82	5	13	13	5	7	36	70	124	242	1	4	6	19	4	3	1	1	6	5	0	48	1	0	2	7	46	14	ATAGAATCACTCTGACATCTAGACAATCGAGTCCCACTAACGTCAGCAAGCTGTCGAAAGCGGGGTAACCGCCAGAAGCCAGGTAATAAGCCACGAGGGTATCCGCTGCAATCCTCAATCCCGGTCACCACATAGATCGAGGTCTATAACACTTTCCCGAAGGAAAGCCACATTCCCTCAAATTTTTTATGATAACCGAAATTGATGCTAACCTGCCGAGTGAGGAAGTGCACCGGAAAGTATGCGAGAGAACCCACACACCATCAAGTTGATTCCCCACTAGCATGAC
OTU_29	MG774962	JF717588	100%, 99%	Glomeraceae	Uncultured glomeraceae	0	0	0	0	0	0	0	0	0	0	0	0	0	0	0	0	0	0	0	0	0	104	0	0	0	0	0	0	25	0	0	9	0	22	7	12	18	0	0	TATAATCACGTTCTAACCTTTTGACCGTCAACTTAGATGGCCGTAAGCAAGCTTTCGGCACCTAAGTAACTTTCAGAGGTCAGGCGGATAGCCTAAAAGGTATTCGTTGCAATCCTCGGTCCTAATCACCACATTTACCAAAGGCTATAACACTTCAACCGAGGCCGAAGCTACATTCCTCCGATCATTTTATGGCGATCAAAACCGACATTGACCTACCATACGAAAAAGTACACCAAAGAAACATACATATTGCAAACAACAAGGCCGTGAAGCTCTCATACGCCCA
OTU_30	MG774963	HQ857077	100%, 100%	Claroideoglomeraceae	Claroideoglomus claroideum	0	0	0	0	0	0	0	0	0	0	0	0	0	0	155	0	0	0	0	24	0	146	0	0	0	26	0	0	0	0	0	2	0	0	0	0	2	101	0	TTTGCTCACACTCTAGCCTGTTCAAAGGCGAATCCTAACGACGTCAGCAAGCTGTCGTCACCAGGATACCAAAGAGAAGCCAGGTGGAACAGCCCTAAAGGTATTCGTTGCAATCCTCAATCCCGAACACCACATTCCGCTAAAGGTTATAACACTCCCGAAGGAGCCACATCCCTCCAGCCTTTTTATGACGTTCGAAATTGATGTTAACCAGCGGACACGAAAGTACTCCCCCTCATCTTGATATCACACACCGTGGCGGTTTTGAGGCTCGTCACAACATGTGGTC
OTU_31	MG774964	HE775335	100%, 99%	Glomeraceae	Rhizophagus sp.	0	0	0	0	0	0	0	0	0	0	7	8	7	18	12	58	6	0	17	7	6	0	0	0	53	4	0	71	31	12	0	0	0	30	5	3	5	57	1	TTTAACCCATTCTAACCTATTGACCATCGACTTTGATAACCATAAGCAAGCTTTCAGCACCAGAGCAACAATCAGAGATCAGACAGGTAGCCCCGAAGGGTATCCGTTGCAATCCTCAATCCCGATCGTCACATCTACCAAAGGCTATAACACTTCAATACGAGATCGAAGCTACATTCCTCCAATCATTTTATGACAACCAAAATTGATGTTAACTTACCACACGAATAAGTACACCCCAAGTACACGAATATACAGGCATAAAGGCGATTAGCTCTTCACGCTCCAC
OTU_32	MG774965	KC411376	100%, 99%	Glomeraceae	Uncultured glomeraceae	0	0	0	0	0	0	0	0	0	0	0	100	0	0	0	0	0	0	0	0	0	17	0	0	0	0	0	0	22	0	0	16	0	6	0	6	17	0	0	TGTAATCACGTTCTAACCTTTTGACCGTCAACTTAAATGACCGTAAGCAAGCTTTCGGCACCTAAGTAACTTTCAGAGATCAGACGGATAGCCTAAAAAGGTATTCGTTGCAATCCTCGGTCCTAATCACCACATCTACCAAAGGCTATAACACTTCAACCGAAGCCGAAGCTACATTCCTCCGGTCATTTTATGGCAACCAAAACCGACGTTGACCTACCATACGAAAAAGTACACCTAAGAAATACGCATATTGCAAACAATGAAGATCTCATACGCCCACAAATGC
OTU_33	MG774966	AB369761	100%, 99%	Glomeraceae	Uncultured glomeraceae	0	0	0	0	0	0	0	0	42	5	5	14	0	0	4	20	11	0	5	1	8	15	12	1	0	2	0	7	58	2	35	3	0	95	22	2	6	18	0	TGTAATCACGTTCTAACCTTTTGACCGCCAACTAGAATGTCATAAGCACGCTTTCGACACCCGAGCGACTTTCAGAGGTCAGACGGATAGCCCAAAGGGTATTCGTTGCAATCCTCGATCCCAATCGTCACATCTACCAAAGGCTATAACACTCCGATACGAGATCGAAGCCACATTCCTCCGATCATTTTATGACGATCAAAATCGATGTTGACCTACCATACGAAAAAGTACACCCTAAAAGTACCATAACGCAAAGCAACGAAGGCCGCGAAGCTCAACGGTTACC
OTU_34	MG774967	KX791299	100%, 92%	Glomeraceae	Rhizophagus sp.	0	0	0	0	0	0	0	0	0	0	2	18	0	0	0	0	0	0	0	0	0	15	0	0	0	0	0	6	18	0	0	0	0	0	0	76	8	7	13	TTTAACCCGTTCTAACCTATTGACCATCAACTTTGATAACCGTAAGCACGCTTTCAGCACCAGAGCAACAATCAGAGATCAGACGAGTAGCCCCGAAAGGTATCCGTTGCAATCCTCAATCCCGATCACTACATCTACCGAAGGCTATAACACTTCAATACGAGATCAAAGCTACATTCCTCCAGCCATTTTATAACGACCAAAATTGATGTTAACCTACCATACGAACAAGTACACCCAAAGAATACGAATATGCAGGCATGAAGGCGGTTAACTCTTCACGTTCCAC
OTU_35	MG774968	FR750190	100%, 99%	Glomeraceae	Rhizophagus irregularis	0	0	0	0	0	0	0	0	0	0	0	3	10	0	0	20	2	0	0	0	0	6	24	18	26	11	13	8	7	2	8	4	35	23	13	4	0	0	5	TTTAACCCATTCTAACCTATTGACCATCGACTTTGATAACTATAAGCACGCTTTCAGCACCAAAGCAACGATCAGAGACCAGACAGGTAGCCCCGAAAGGTATCCGTTGCAATCCTCAATCTCGATCACCACATCTACCGAAGACTATAACACTTCAATACAAGATCGAAGCTACATTCCTCCAGCCATTTTATGGTGCCCGAAATTGATGTTAACCAACCACACGGGGCAAGTACACCCAAGAGCACGAATATGCAAAGCATGAAGGTGTTAAGCTCCTCAAACTCCA
OTU_36	MG774969	LC191631	100%, 99%	Glomeraceae	Rhizophagus sp.	83	0	0	0	0	0	0	0	0	1	2	0	0	0	0	0	0	0	0	5	0	0	0	0	0	5	2	7	10	0	1	0	0	0	0	0	2	2	4	TTTAACCCGTTCTAACCTTTTGACCATTAACTTTGATGACCGTAAGCACGCTTTCGGCACCAGAGTAACCATCAGAGATCAGGCGGGTAGCCCAAAGGGTATCCGTTGCAATCCTCAATCCCGATCATCACATCTACCAGAGGCTATAACACTTCAACCGAGATCGAAGCTACATTCCTCCCGTCATTTTATGACGACCGAAATTGATGTTAACCTACCAGCAGGTAAGTACACCCAAGGGGGACGAATATGCAGAACATGAGGGCCGTGAAGCTCAACATAACCCACA
OTU_37	MG774970	KP728532	100%, 98%	Glomeraceae	Uncultured glomeraceae	0	0	0	0	0	0	0	0	0	0	0	0	0	0	278	0	0	0	0	14	0	0	0	0	0	0	0	0	0	0	0	0	0	0	0	0	0	95	0	TTAATTCACATTCCAATCTATTTGCTAACTATTCAAACAACAAAAGCAAGCTGTTGCAATCTGAACGTCAACAAGAGACCAGACGGAACTGCCCTAAAGGTATTCGTTGCAATCCTCAATCCCAATCGCCACATTCCGCTAAGGGTTATAACACTCCCGAAGGAGCCACATCCCCTTAACCTTTTTATGACAATCAAAATTGATGCTAACCAGCAGACAACAAAGTACACGGCAACACAGCTGAAGCTTACGGGATGGCGGTTTTGACACTCGCCATCGGGTAAGCTTC
OTU_38	MG774971	KP728553	99%, 99%	Claroideoglomeraceae	Claroideoglomus claroideum	0	0	0	0	0	0	0	0	0	0	0	0	0	0	77	0	0	0	0	10	0	63	0	0	0	20	0	0	0	0	0	0	0	0	0	0	2	145	0	TTTGCTCACACTCTAGCCTGTTCAAAGGCGAATCCTAACAAAGTCAGCAAGCTGTCGTCACCAGGATACCAAAGAGAAGCCAGGTGGAACAGCCCTAAAGGTATTCGTTGCAATCCTCAATCCCGAACACCACATTCCGCTAAAGGTTATAACACTCCCGAAGGAGCCACATCCCTCCAGCCTTTTTATGACGTTCGAAATTGATGTTAACCAGCGGACACGAAAGTGCTCCCCCTCATCGTGAGGTCACACGCCGTGGCGGTTTTGAGGCTCGCCACAACATGTGACC
OTU_39	MG774972	KP265041	100%, 99%	Glomeraceae	Rhizophagus sp.	0	0	0	0	0	0	0	0	0	8	4	36	1	2	2	8	3	2	12	10	1	5	2	9	5	28	7	0	12	4	11	1	5	5	3	1	1	21	6	TTTAACCCGTTCTAACCTTTTGAAAATCACTTTCGATGACCGTAAGCACGCTTTCGGCACCGGAGCAACCTTCAGAGATCAGATGGGTAGCCCCGAGGGGTATCCGTTGCAATCCTCAATCCCAATCGTCACATCTACCAGAGGCTATAACACTTCGATACGAGATCAAAGCTACATTCCTCTAATCATTTTATGCCGATCGAAATTGATGTTAACCTACCACACAGACAAGTACACCCAAGAGCACAAATATGCAATACATGAAGGCGGTTAAACTCCTCATAAACCA
OTU_40	MG774973	KP728534	100%, 98%	Glomeraceae	Uncultured glomeraceae	0	0	0	0	0	0	0	0	0	0	0	1	0	0	32	0	0	0	0	0	0	14	0	0	15	3	1	6	6	86	4	0	7	0	1	1	2	68	34	TTAATTCACATTCCAATCTATTTACTAACTAATTCAAACAACAAAAGCAAGCTGTTGCTATCTGAACGTCAACAAGAGACCAGACGGAACTGCCCTAAAGGTATTCGTTGCAATCCTCAATCCCAATCGCCACATTCCGCTAAGGGTTATAACACTCCCGAAAGAGCCACATCCCCTTAACCTTTTTATGACAATCAAAATTGATGCTAACCAGCAGACAACAAAGTACACGCTAGCATAGCTGAAATTTACAGGATGGCGGTTTTGACACTCGCCATGGGTAAATTTC
OTU_41	MG774974	HF968920	100%, 99%	Glomeraceae	Rhizophagus irregularis	0	0	0	0	0	0	0	0	0	0	1	12	6	0	0	0	0	0	0	0	0	7	17	10	4	2	7	6	0	4	4	2	32	17	4	4	0	0	1	TTTAACCCGTTCTAACCTTTTGACCATCGACTTTGATAACCGTAAGCAAGCTTTCGGCACCAGAGCAACGATCAGAGATCAGACAGGTAGCCCCGAAGGGTATCCGTTGCAATCCTCAATCTTGATCATCACATCTACCGAAGGCTATAACACTTCAATACGAGATCGAAGCTACATTCCTCCAGTCATTTTATGACAACCAAAATTGATGTTAACTAACCACACGGGCAAGTACACCCAAGAGTACGAATATGCAAAACATGAAGGTGTTTAAGCTCCTCACACTCCA
OTU_42	MG774975	KF849683	100%, 97%	Glomeraceae	Uncultured glomeraceae	45	0	0	0	0	0	0	0	0	0	0	0	0	0	0	0	0	0	0	0	0	0	0	0	0	0	2	1	0	0	0	0	0	0	0	2	0	3	0	TTTAACCCGTTCTAACCTTTTGACAATCAACTTTGATGACCGTAAGCACGCTTTCGGTACCAGAGCAACCATCAGAGATCAGGCGAGTAGCCCAGAGGGTATCCGTTGCAATCCTCAATCCCGATCATCACATCTACCAGAGGCTATAACACTTCAACCGAGATCGAAGCTACATTCCTCCCGTCATTTTATGACGACCGAAATTGATGTTAACCTACCACCGGGAAAGTACACCCAAGGGGTACGAATATGCAGACCCGAGGGCCGTGAAGCTCCTCAAAACCCACAG
OTU_43	MG774976	AM040317	75%, 98%	Claroideoglomeraceae	Claroideoglomus claroideum	0	0	0	0	0	263	0	191	2	0	0	0	33	0	1	0	0	0	0	0	0	5	0	1	6	0	1	47	3	5	0	0	13	0	2	0	0	3	8	TTAATTCACTTTCCAATCTATTTGCTAACTATTCAAACAAAAGCAAGCTGTTGCCATCTGAACGTCAACAAGAGACCAGACGGAACTGCCCTAAAGGTATTCGTTGCAATCCTCAATCCCGATCACCACATTCCGCTAAAGGTTATAACACTCCCGAAGGAGCCACATCCCTCCAGCCTTTTTATGACGTTCGAAATTGATGTTAACCAGCGGACACGAAAGTGCTCCCCCTCATCGTGAGACACATGCTGTGGCGGTTTTGAGGCTCGCCACAACATGGGTCTCCCGA
OTU_44	MG774977	KP756598	100%, 94%	Gigasporaceae	Scuttelospora sp.	0	0	0	0	0	0	0	0	3	0	3	0	0	0	2	3	0	16	0	4	2	5	6	1	0	2	0	4	11	17	5	0	4	3	1	6	0	9	10	TTTATGCTCGCTCTAACCTTTTGATCAATAATCAGATCATAATCAGCATGCTGTCTATAACCCAACATCGAATCAGAGGCCAGGCGGCTAGCCTAAAAGGTATCCGTTGCAATCCTCGATCCCAAACATCACATTAATTAAAGGCTATAACACTCCCGAAAGAGCTACCTTCCCCCAATCATTTTATGACGTTCAAAATCGACGCTAACTTACCAAACGAAGAAGTGCGTTCCAGAGTTGGGTTCAAAAAAATCCCCCTTCCCCGAAATTGATTCCCGTCGGTATGACT
OTU_45	MG774978	KP756518	100%, 93%	Gigasporaceae	Scuttelospora sp.	0	0	0	0	0	0	0	0	0	4	10	7	4	0	0	6	0	21	0	1	7	1	2	2	0	0	5	1	0	21	4	0	5	4	0	1	0	2	6	TTTATGCTCACTCTAACCTTTTGACCAATAATCAGATCATAGTCAGCATGCTGTCTATAACCCAACATCGAATCAGAGGCCAGGCGGCTAGCCTAAAAGAAGGTATCCGTTGCAATCCTCGATCCCAAACATCACATTAATTAAAGGCTATAACACTCCCGAAGGAGTTACCTTCCTCCAATCATTTTATGACGTTCAAAATCGACGCTAACTTACCAAACGAAGAAGTGCGTTCCAGAGTTGGGTTCAAAAAAATCCCCCTTCCCCGAAATTGATTCCCGTCGGTATG
OTU_46	MG774979	KF849683	100%, 99%	Glomeraceae	Uncultured glomeraceae	114	0	0	0	0	0	0	0	0	4	0	0	0	0	0	6	2	11	0	0	0	5	0	1	4	10	7	12	18	0	1	0	0	2	0	5	0	3	0	TTTAACCCGTTCTAACCTTTTGACAATCAACTTTGATGACCGTAAGCACGCTTTCGGTACCAGAGCAACCATCAGAGATCAGGCGGGTAACCCAGAGGGTATCCGTTGCAATCCTCAATCCCGGTCATCACATCTACCAGAGTCTATAACACTTCAGTACGAGACCGAAGCTACATTCCTCCCGTCATTTTATGACGACCGAAATTGATGTTAACCTACCACCGGGAAAGTACACCCAAGGGGTACGAATATGCAGACCCGAAGGCCGTGAAGCTCCTCAAAACCCACA
OTU_47	MG774980	KY555057	100%, 97%	Glomeraceae	Rhizophagus sp.	0	0	0	0	0	0	0	0	0	3	5	25	0	0	0	0	0	42	0	9	1	0	2	8	0	0	0	5	7	3	0	0	0	0	0	9	8	0	0	TTTAACCCGTTCTAACCTGTTGACCGTCAACTTTGATAACCGTAAGCAAGCTTTCGGCACCAGAGCAACTATCAGAGATCAGACGGGTAGCCCCGAAGGGTATCCGTTGCAATCCTCAATCCCGATCATCACATCTGCCGAAGGCTATAACACTTCAATACAAGATCGAAGCTACATTCCTCCAACCATTTTATGACATCCGAAATTGATGTTAACCAACCATGCGAGCAAGTACACCCAAAGAGCACGAATATGCAGGCATAAGGGTGTTTAGCTCCTCACACTCCAC
OTU_48	MG774981	EF066448	100%, 99%	Glomeraceae	Uncultured glomeraceae	0	0	0	0	0	0	0	0	0	0	0	0	0	0	0	0	0	0	0	45	0	0	0	0	0	0	0	0	0	0	0	0	0	0	0	0	0	0	0	TTAATTCACATTCCAATCTATTCGCCAACTATTCAAACAACGTCAGCAAGCTGTCGCCATCTGAACGTCAACAAGAGACCAGAAGGAACTGCCCTAAAGGTATTCGTTGCAAACCTCAATCCCAATCGTCACATTCCGCCAAGGGTTATAACACTCCCGAAGGAGCCACATCCCCTTAACCTTTTTATGACAATCAAAATTGATGCTAACCAGCAGACAACAAAGTACACGGAAACGTAAAGCAATAAATTACCTCACGATACCCGTTGAGTTGATGACTGCACGACTG
OTU_49	MG774982	LN811001	100%, 99%	Acaulosporaceae	Acaulospora baetica	0	0	0	0	0	0	0	0	0	11	3	5	0	3	2	1	2	8	31	34	46	0	1	4	2	1	0	0	0	3	5	0	13	2	0	1	0	11	4	ATAGAATCACTCAAACATCTAGACAATCGAATCCCACTAACGTCAGCAAGCTGTCGAAAGCGGGGCAACCGTCAGAAGCCAGGTGACAAGCCACGAAGGTATCCGCTGCAAACCTCAATCCCGGTCACCACATAGATCGAGGTCTATAACACTTTCCCGAAGGAAAGCCACATTCCCTCAAAATTTTTATGATAACCGAAATTGATGCTAACCTGCCGAGTGAGGAAGTGCACCGGAAAGTATGCGAGAGAACCCACACACCATCAAGTTGATTCCCCACTAGCATGAC
OTU_50	MG774983	JF717500	100%, 99%	Glomeraceae	Uncultured glomeraceae	0	0	0	0	0	0	0	0	0	0	0	0	0	0	0	36	0	0	0	0	0	0	0	1	0	2	0	1	2	0	9	0	0	15	6	1	0	0	0	TGTAATCACGTTCTAACCTTTTGACCGCCAACTAGAATGTCATAAGCACGCTTTCGACACCCGAGCGACTTTCAGAGGTCAGACGGATAGCCCAAAGGGTATTCGTTGCAATCCTCGATCCCAATCGTCACATCCACCAAAGGCTATAACACTCCGATACGAGATCGAAGCCACATTCCTCCGATCATTTTATGACGATTAAAATCGATGTTGACCTACCATACGGAAAAGTACACCTAAAAGTACCATAACGCAAAGCAACGAAGGCCGCAAAGCTCAACATTACCCA
OTU_51	MG774984	AY639281	100%, 99%	Glomeraceae	Funneliformis mosseae	0	0	0	0	0	0	0	0	0	0	0	0	0	0	0	0	0	0	0	0	0	0	0	0	0	0	0	0	0	0	0	0	0	0	0	0	0	45	0	TTTAATCCGTTCTAACCTTTGACCCGTGAACCCTAATATCGTTAGCGAGCTTCCGATACTAAAGACAAGTACCAAAGATCAGACGAATAGCCCTGAAGGGTATCCGTTGCAATCCTCGGTCTTGATCATTACATCTGCCAAAGGCTATAATACCTCGATCGAAATCAAAGTTACATTCCTTCAACCATTTTATAATGATTAAAACCGATGTTGACTAACCGTACGAAAAAGTGCACCAAGAGATCCCAATCTCACAAATCCGAAGGCTTTGAAACTCTTCAAACCCACA
OTU_52	MG774985	AJ459322	84%, 91%	Acaulosporaceae	Acaulospora sp.	0	0	0	0	0	0	0	0	0	3	4	0	0	0	0	0	0	0	0	0	0	28	0	1	0	0	0	1	0	0	0	0	0	10	0	6	0	0	0	AATGATTCACTCTGACATCTAGACAATCGAGTCCCACTAAAATCGAGAGCGGGGTAACCGTCAGAAGACAGGTGATAAACCAAAGGGTATCCCGCTGCAATCCTCAATCCCGGTCACCACATAGATCAAGGTCTATAACACTTTTCTGAAGAAAAGCCACATTCCCTCAAATTTTTTATGATAACCGAAATTGATGCTAACTTGCCAAGTGAGGAAGTGCACCGGAAAGTATGCGAGCGGACCTTATATTACCTCACGGAGGTATGTTAAGCGAGCCCCACACACACCA
OTU_53	MG774986	AY639343	79%, 94%	Claroideoglomeraceae	Claroideoglomus claroideum	0	0	0	0	0	0	0	187	0	0	0	0	0	0	0	0	0	0	0	0	0	0	0	0	0	0	0	0	0	0	0	0	0	0	0	0	0	0	0	TTTGCTCACACTCTAACCTGTTCAAAGGCGAATTCCTAACGACGTCAGCAAGCTGTCGTCACCAGGATACCAAAGAGAAGCCAGGTGGAACAGCCCTAAAGGTATTCGTTGCAATCCTCAATCCCGATCACCACATTCCGCTAAAGGTTATAACACTCCCGAAAGAGCCACATCCCTCTGACCTTTTTATGACAATCGAAATTGACGCTGACCAGCAGACACCAAAATGCACGGACAAACACAAGCAAAAGCTAGCATTTAAACCGTTGAATCGATGACTGCACGACTG
OTU_54	MG774987	KP756513	79%, 90%	Gigasporaceae	Gigaspora margarita	0	0	0	0	0	0	0	0	0	0	0	0	0	0	0	0	0	0	0	0	0	3	0	39	1	1	2	17	12	0	0	0	0	0	1	5	0	3	0	TTTATGCACGCTCTAACCTTTTAACCAGTAATTAGATCACGATCAGCATGCTGTCCGTAACCCAACACCAATTAGAGATCAGGCGGCTAGCCCCGAAGGGTATCCGTTGCAATCCTCGATCCCAGACATCACATCTACCAAGGGCTATAACACTCCCGAAGGAGCCACATCCCTCCAGCCTTTTTATGACGTTCGAAATTGATGTTAACCAGCGGACACGAAAGTGCTCCCCCTCATCGTGAGACACATGCTGTGGCGGTTTTGAGGCTCGCCACAACATGGGTCTCCC
OTU_55	MG774988	KP756446	66%, 97%	Acaulosporaceae	Acaulospora laevis	0	0	0	0	0	0	0	0	0	7	19	33	0	0	2	16	2	2	3	10	6	0	0	0	0	0	2	1	0	0	0	0	2	0	0	6	0	0	0	TTTAACCCGTTCTAACCTTTTGAAAATCACTTTCGATGACCGTAAGCACGCTTTCGGCACCGGAGCAACCTTCAGAGATCAGACGGGTAGCCCCCGAAGGGGTATCCGTTGCAATCCTCAATCCCAATCGTCACATCTACCAGAGTCTATAACACTCCACCGAAGGGAAGCCACATTACCCCAATTATTTGATGACAATCAAAATTGATGCTAACCTGCCAGACGAGGAAGTGCACACGGAGGAGATGAGAGACTCACACCACCAAGTTGATTCCTCGCTAGCATGACT
OTU_56	MG774989	HG938303	100%, 100%	Glomeraceae	Dominikia bernensis	0	0	0	0	0	0	0	0	0	0	0	0	0	0	0	0	0	0	0	0	0	0	0	0	0	0	0	0	73	0	0	0	0	0	0	0	0	0	0	TGTAATCACGTTCTAACCTTTTGACCGTCGTCTTAAATACCATAAGCAAGCTTTCGGCACCCAAGCAACTTCCAGAGGTCAGACGGATAGCCCTAAAGGGTATTCGTTGCAATCCTCAGTTTCGATCACCACATCTACCAAAGGCTATAACACTTCAATACGAGATCGAAGCTACATTCCTCCAATCATTTTATGGTGATCGAAACTGACGTTGGCCTACCATACGAAAAAGTACACCCAAAAAGCACAAACATGCAAACAGCGAGGCCTTTGACAGCTCACGCACGCC
OTU_57	MG774990	KY555039	100%, 96%	Glomeraceae	Rhizophagus sp.	0	0	0	0	0	0	0	0	0	0	0	6	0	0	0	0	0	0	0	6	0	0	0	1	0	0	0	1	5	3	0	0	0	0	0	2	1	0	0	TTTAACCCGTTCTAACCTGTTGACCGTCAACTTTGATAACCGTAAGCAAGCTTTCGGCACCAGAGCAACAATCAGAGATCAGACGGGTAGCCCCGAAGGGTATCCGTTGCAATCCTCAATCCCGGTCATCACATCTGCCGAAGGCTATAACACTTCAATACGAGATCGAAGCTACATTCCTCCAACCATTTTATGACATCCGAAATTGATGTTAACCAACCATGCGGGCAAATACACCCAAAGCGCACGAATACGCAGGCACAAGGGTGTTTAACTCCTCACGCTCCAC
OTU_58	MG774991	AB914598	92%, 89%	Glomeraceae	Uncultured glomeraceae	0	14	0	0	9	7	69	0	0	0	0	0	0	0	0	0	0	0	0	0	0	0	0	0	0	0	0	0	0	0	0	0	0	0	0	0	0	0	0	CTTACGATCGCTCTTTCCTATTGCCCACCCGCCCTAACACTGTAAGATACTCTTGCAATGAAAGGGTAGCAACCAGAAGAAAGCCGACTAGCCCACCCAGGTTGGGTATTCCCGGATAGGAGTCCGCTGCACTCCTCGGTCCCAAAGATCGCATCCATGGCTGCCTATAACACCCCCGAAGGGGCCACATTGCTGCCATTCTTTTACGACCCTCAAAACCGATGCTGACCTGCCCTACGCAAAAGTGCACCAGTAGAATGGATGCAACATAGTCCACCTATTCTACTAG
OTU_59	MG774992	KP756440	100%, 99%	Acaulosporaceae	Acaulospora laevis	0	0	0	0	0	0	0	0	0	3	6	15	0	0	6	1	0	0	0	5	1	0	0	0	0	0	0	0	0	0	0	0	0	0	0	1	0	0	0	TTTAAGATCACTCTAACTTCTAGACTGTCGGGTCCCACAATCATCAGCAAGCTGTCAAAAGCGAGGTGACCGCCAGAAGCCAGGTGACTAGCCAAGAGGCATCCGCTGCAATCCTCAATCCCAATCGCCACATCCACCAGGGTCTATATAACACTCCACCGAAGGGAAGCCACATTACCCCAATTATTTGATGACAATCAAAATTGATGCTAACCTGCCAGACGAGGAAGTGCACACGGAGGAGATGAGAGACTCACACCACCAAGTTGATTCCTCGCTAGCATGACTG
OTU_60	MG774993	AY639343	78%, 94%	Claroideoglomeraceae	Claroideoglomus sp.	0	0	0	0	0	0	0	89	0	0	0	0	0	0	0	0	0	0	2	0	0	2	0	0	0	1	1	10	0	3	2	1	0	16	0	0	1	0	1	TTTGCTCACACTCTAACCTGTTCAAAGGCGAATTCCTAACGACGTCAGCAAGCTGTCGTCACCAGGATACCAAAGAGAAGCCAGGTGGAACAGCCCTAAAGGTATTCGTTGCAATCCTCAATCCCGATCACCACATTCCGCTAAAGGTTATAACACTCCCGAAAGAGCCACATCCCTCTGACCTTTTTATGACAATCGAAATTGACGCTGACCAGCAAACACCAAATTACACGGCTATGTAGGATCTAACACAAGATGGCGGTTTTGAGGCTCGCCATCCCGTGTTAGA
OTU_61	MG774994	KP756443	100%, 99%	Acaulosporaceae	Acaulospora laevis	0	0	0	0	0	0	0	0	0	0	1	14	0	0	0	1	0	0	3	0	0	0	0	0	0	0	0	0	0	0	0	0	0	0	0	0	0	0	0	TTTAAGATCAGACCGACACCTAGACCGCCGAGTCCCACAATCGTCAGCAAGCTGTCGAAAGCGAGGTGACAGCCAGGAATCAGGTGACTAGCCAAGAGGCATCCGCTGCAATCCTCAATCCCAATCGTCACATCCACCAGGGTCTATATAACACTCCACCGAAGGGAAGCCACATTACCCCAATTATTTGATGACAATCAAAATTGATGCTAACCTGCCAGACGAGGAAGTGCACACGGAGGAGATGAGAGACTCACACCACCAAGTTGATTCCTCGCTAGCATGACTG
OTU_62	MG774995	KP728512	80%, 97%	Glomeraceae	Uncultured glomeraceae	0	0	0	0	0	0	0	0	0	0	0	0	0	0	0	0	0	0	0	0	0	0	0	0	14	4	0	0	0	0	9	3	27	0	0	0	0	0	12	TTAATTCACTTTCTAATCTATTTGCTAACTAATTCAAACAACAAAAGCAAGCTGTTGCTATCTGAACGTCAACAAGAGACCAGACGGAACTGCCCTAAAGGTATTCGTTGCAATCCTCAATCCCAATCGCCACATTCCGCTAAGGGTTATAACACTCCCGAAGGAGCCACATCCCCTCGACCTTTTTATGACAATCGAAATTGATGCTGACCAGCAAACACCAAAATACACGGCTATGTAGGCATCTAACACAAGACAGCGGTTTTGAGGCTCGCCATCTCGCGTTAGA
OTU_63	MG774996	FN643146	100%, 99%	Glomeraceae	Uncultured glomeraceae	0	0	0	0	0	0	0	0	0	0	0	0	0	0	0	0	0	0	0	18	0	0	0	0	5	0	0	0	0	0	0	0	0	0	0	0	0	0	0	TTAATTCACTTTCCAATCTATTCGCCAACTATTCAAACAACGTCAGCAAGCTGTCGCCATCTGAACGTCAACAAGAGACCAGAAGGAACTGCCCTAAAGGTATTCGTTGCAAACCTCAATCCCAATCGCCACATTCCGCCAAGGGTTATAACACTCCCGAAGGAGCCACATCCCCTTAACCTTTTTATGACAATCAAAATTGATGCTAACCAGCAGACAACAAAGTACGCGCTAGCATAGTTAAACTTACTTGATGACGGTTTTGACACTCGCCACCAGGTAAATTTAG
OTU_64	MG774997	AB369792	100%, 99%	Acaulosporaceae	Acaulospora sp.	0	0	0	0	0	0	0	0	0	1	0	0	0	0	0	0	0	0	0	0	0	0	0	0	5	0	0	0	0	0	0	0	10	0	0	0	1	0	0	TTTATGATCACTCCAACATCTAGACAATTAAATCCCATCAACGTTAGCAAGCTATCGAAGACGGGGTAACCATCAGAAGCAAGGTGACTAGCCCAAAAGGGTATCCGCTGCAATCCTCAATCCCGGTCACCACATTAATCAAGGTCTATAACACTTTTCCGAAGAAAAGCCACCTTCCCTCAATTTTTATATGATAACCAAAATTGATGCTAACTAGTAAGTAAGGAAGTGCACTCGAAAGAACACGAGTAAACCCGCAAACCATCAAGTTGATTCCCTACCAACATGA
OTU_65	MG774998	KF206466	100%, 99%	Acaulosporaceae	Acaulospora sp.	0	0	0	0	0	0	0	0	0	0	0	7	0	18	0	0	0	0	19	1	2	0	1	0	0	0	0	0	0	0	0	0	0	0	1	0	1	0	1	AATCAATCACTCTGACATCTAGACGATCGAGTCCCACTAACGTTAGCGAGCTATCGAAAGCGGGGTAACCGTCAGAAGCCAGGTGACGAGCCACGAGGGTATCCGCTGCAATCCTCAATCCCGGTCACCACATAGATCGAGATCTATAACACTTTCCCGAAGGAAAGCCACATTCTCTCAAATTTTTTATGATAACCGAAATTGATGCTAACCTGCTGGGTGAGAAAGTGCACCGGAAAGTACGAGGGAGAACCCACGCACCATCCGGTTGATTCCTCACTAGCATGAC
OTU_66	MG774999	LT855295	100%, 100%	Glomeraceae	Uncultured glomeraceae	0	0	0	0	0	0	0	0	0	0	0	0	0	0	0	0	0	0	0	0	0	0	0	0	0	0	0	16	0	0	0	0	0	0	0	0	0	0	0	TTTAACCCGTTCTAACCTATTAACCATCGACTTTGATAACCGTAAGCACGCTTTCGGCACCAGAGCAACGATCAGAGATCAGACAAGTAGCCCCGAAGGGTATCCGTTGCAATCCTCAATCCCGATAATCACATCTACCAAAGGCTATAACACTTCAATACGAGATCGAAGCTACATTCCTCCAGTCATTTTATGACGACCAAAATTGATGTTAACTTACCACACGAATAAGTACACCCCAAGTACACGAATATACAGGCATGAAGGCGATTAGCTCCTCACACTCCAC
OTU_67	MG775000	AB913898	100%, 99%	Glomeraceae	Uncultured glomeraceae	0	0	0	0	0	0	0	0	0	2	1	0	2	0	0	21	0	0	8	0	0	1	0	0	0	0	0	0	0	0	0	0	1	3	5	0	0	0	0	TGTAATCACGTTCTAACCTTTTGACCGCCAACTAAAATGTCATAAGCACGCTTTCGACATCCGAGCGACTTTCAGAGGTCAGACGGATAGCCCAAAAGGGTATTCGTTGCAATCCTCGATCCCAATCGTCACATCTACCAAAGGCTATAACACTCCGATACAAGATCAGAGCCACATTCCTCCGATCATTTTATGACGATCAAAATCGATGTTGACTTACCATACGGAAAAGTACACCTCAAAAGCACCATAACGCAAGCAACGAAGGCCGTGAAGCTCAACGTCATTC
OTU_68	MG775001	KP728534	99%, 97%	Glomeraceae	Uncultured glomeraceae	0	0	0	0	0	0	0	0	0	0	0	0	0	0	0	0	0	0	0	0	0	0	2	0	3	3	0	0	0	1	0	0	1	0	0	0	0	47	19	TTATTCACATTCCAATCTATTTGCCAACTATTCAAACAACAAAAGCAAGCTGTTGCCATCTGAATGTCAACAAGAGACCAGACGGAACTGCCCTAAAGGTATTCGTTGCAAACCTCAATCCCAATCGTCACATTCCGCTAAGGGTTATAACACTCCCGAAGGAGCCACATCCCCTTAACCTTTTTATGACAATCAAAATTGATGCTAACCAGCAGACAACAAAGTACACGCCTAGCATAGCTGAAATTTACAGGATGGCGGTTTTGACACTCGCCATGGGTAAATTTCC
OTU_69	MG775002	JF717605	100%, 98%	Glomeraceae	Uncultured glomeraceae	0	0	0	0	0	0	0	0	0	0	1	3	1	0	0	3	0	5	48	1	0	6	0	2	0	0	0	1	5	6	4	0	6	7	12	6	7	9	0	TGTAATCGCGTTCTAACCTATTGACCGCCAACTAGAATATCATAAGCACGCTTTCGACACCCCAGCGACTTTCAGAGGTCAGACGGATAGCCCAAAAGGTATTCGTTGCAATCCTCGATCTTAATCGTCACATCTACCAAAGGCTATAACACTCCGATACGAGATCGAAGCCACATTCCTCCGATCATTTTATGACGTTCAAAATCGATATTGACCTACCATACGGAAAAGTGCACAACAAAAGTACCATAACGCAAAGCAACGAAGGCCGCGAAGCTCAACGTCACCC
OTU_70	MG775003	KT250827	64%, 96%	Paraglomeraceae	Paraglomus occultum	0	0	0	0	0	3	0	0	0	0	0	0	1	0	0	0	0	3	0	0	0	1	0	1	0	0	0	0	1	0	0	0	1	0	0	3	0	0	1	CCGCTGGCTTGCCTGTTCCGGTGCACTGCCGCTCCCGCGTCCGCTAGCACGCTATCGAACGAGGGTGGCCGAGCAGGGTTCGGTCGCCGCGCCCCCGAGGGGGTGTCCGCTGCAATCCTCAGTCCCGCGCAGCGCATCTGCCCAGGTCTATAACACTCCCGAAGGAGCCACATCCCTCCAGCCTTTTTATGACGTTCGAAATTGATGTTAACCAGCGGACACGAAAGTGCTCCATTTCACCAAGAGTTCACGCTTCGTGACGGTTTTGAGGCTCGCCACGCCATGTGAT
OTU_71	MG775004	KP728532	100%, 98%	Glomeraceae	Uncultured glomeraceae	0	0	0	0	0	0	0	0	0	0	0	0	0	0	47	0	0	0	0	2	0	0	0	0	0	0	0	0	0	0	0	0	0	0	0	0	0	27	0	TTAATTCACTTTCCAATCTATTCGCTAACTATTCAAACAACCAAAGCAAGCTGTTGCCATCTGAACGTCAACAAGAGACCGGACGGAACTGCCCTAAAGGTATTCGTTGCAAACCTCAATCCCAATCGTCACATTCCGCTAAGGGTTATAACACTCCCGAAGGAGCCACATCCCCTTAACCTTTTTATGACAATCAAAATTGATGCTAACCAGCAGACACCAAAGTACACGGCAACACAACTGAAGCTTACGGGATGGCGGTTTTGACACTCGCCATCGGGTAAGCTTC
OTU_72	MG775005	FJ820862	80%, 97%	Glomeraceae	Uncultured glomeraceae	0	0	0	0	0	0	0	0	0	0	0	0	0	0	0	0	0	0	0	0	0	0	0	0	62	0	0	1	0	0	13	1	0	0	0	0	1	0	25	TTAATTCACTTTCTAATCTATTTGCTAACTAATTCAAACAACAAAAGCAAGCTGTTGCTATCTGAACGTCAACAAGAGACCAGACGGAACTGCCCTAAAGGTATTCGTTGCAAACCTCAATCCCAATCGCCACATTCCGCTAAGGGTTATAACACTCCCGAAGGAGCCACATCCCCTCGACCTTTTTACGACAATCGAAATTGATGCTGACCAGCAGACACCAAAATACACGGCTATGTCGATTCTTAACACTTTCGTGTCAAGCACCTCCATAGCCGTTGAGTTAGTG
OTU_73	MG775006	KF206551	71%, 91%	Archaeosporaceae	Archaeospora sp.	0	0	0	0	0	0	0	0	0	0	0	0	3	0	0	0	0	0	0	0	0	0	0	49	0	0	0	1	0	0	0	0	0	0	0	1	0	0	2	TTTAACGGAAATCAAACCTATTGTAAACCTATCAACCAGAGCTCAGCAAGCTGAAAACTAATTGAAGGTCGACAGAGGCAAGATCCGTAGCAAAGCATCCGCTGCAATCCTCAGTCCCCGTCACGCCATCTAAAGTAGGCTATAACACTCCCGAAGGAGCCACATCCCTCCAGCCTTTTTATGACGTTCGAAATTGATGTTAACCAGCGGACACGAAAGTGCTCCCCCTCATCGTGAGACACATGCTGTGGCGGTTTTGAGGCTCGCCACAACATGGGTCTCCCGACGA
OTU_74	MG775007	AJ510231	100%, 99%	Gigasporaceae	Scutellospora calospora	0	0	0	0	0	0	0	0	0	2	1	5	0	0	5	0	0	0	0	1	1	0	4	1	0	0	0	0	0	4	2	0	0	7	0	3	1	0	2	TTTATGCTCGCTCTAACCTTTTGACCAATAATCAGATCATAGTCAGCATGCTGTCTATAACCCAACATCGAATCAGAGGCCAGGCGGCTAGCCTAAAAGGTATCCGTTGCAATCCTCGATCCCAAACATCACATTAATTAAAGGCTATAACACTCCCGAAGGAGCTACCTTCCTCCAATCATTTTATGATATTCAAAATCGACGCTAACCTGCCAAGCAAGGAAGTGCACTTCAAAGTTAGGTTCAAAAAAATCCCCCTTCCCCAAAATTGATTCCCGCCGGCATGACT
OTU_75	MG775008	KF206550	59%, 97%	Archaeosporaceae	Archaeospora sp.	0	0	0	0	0	10	0	7	0	0	0	0	0	0	0	0	0	0	0	0	0	0	0	0	0	0	0	0	2	0	0	0	2	0	0	0	0	0	0	TTTATCGAATTCCTTCCTATTGTAAACCTATCAACCGCTCGTCAGCAAGCTGACGATCAATTGAAGATCGACAGAGAAAAGATCCGTAGCCAAAGGCATTCGCTGCAATCCTCAGTCCTCGTCGCGCCATCTAAAGTAGGCTATAACACTCCCGAAGGAGCCACATCCCTCCAGCCTTTTTATGACGTTCGAAATTGATGTTAACCAGCGGACACGAAAGTGCTCCCCCTCATCGTGAGACACATGCTGTGGCGGTTTTGAGGCTCGCCACAACATGGGTCTCCCGACG
OTU_76	MG775009	KP756518	100%, 97%	Gigasporaceae	Scutellospora sp.	0	0	0	0	0	0	0	0	0	0	0	0	0	0	0	0	0	0	0	1	1	4	3	0	0	0	0	0	0	0	0	0	1	4	0	2	0	0	0	TTTATGCTCGCTCTAACCTTTTGATCAATAATCAGATCATAGTCAGCATGCTGTCTATAACCCAACATCGAATCAGAGGCCAGGCGGCTAGCCTAAAAAGGTATCCGTTGCAATCCTCGATCCCAAACATCACATTAATTAAGGGCTATAACACTCCCGAAAGAGCTACCTTCCCCCAATCATTTTATAACGTTCAAAATCGACGCTAACCTGCCAAACGAAGAAGTGCATTTCAGAGTTAGGTTCAAAAAAATCCCCCTTCCCCAAAATTGATTCCCGTCGGCATGAC
OTU_77	MG775010	AY639344	100%, 100%	Claroideoglomeraceae	Claroideoglomus claroideum	0	0	0	0	0	1	0	0	0	0	0	0	2	0	0	0	0	0	0	0	0	0	0	7	1	0	0	2	2	0	0	0	1	0	0	0	0	0	0	TTTGCTCACACTCTAACCTGTTCAAAGGCGAATCCTAACGACGTCAGCAAGCTGTCGTCACCAGGATACCAAAGAGAAGCCAGGTGGAACAGCCCTAAAGGTATTCGTTGCAATCCTCACTCCCGAAGGAGCCACATCCCTCCAGCCTTTTTATGACGTTCGAAATTGATGTTAACCAGCGGACACGAAAGTGCTCCCCCTCATCGTGAGACACATGCTGTGGCGGTTTTGAGGCTCGCCACAACATGGGTCTCCCGACGAGAGGGTTGATTTCGCGCCAGCACGACTG
OTU_78	MG775011	AJ459325	88%, 98%	Acaulosporaceae	Acaulospora sp.	0	0	0	0	0	0	0	0	0	1	2	0	0	0	0	0	0	0	0	0	0	6	0	0	0	0	0	0	0	0	0	0	0	5	0	6	0	0	0	AAATGAATCACTCTAACATCTAGACAATCGAGTCCCACTAACGTCAGCGAGCTGTCGAAAGCGGGGTAACCGTCAGAAGCCAGGTGACCAGCCACAAGGGTATCCGCTGCAATCCTCAATCCCGGTCACCACATAGATCAAGGTCTATAACACTTTTCCGAAGAAAAGCCACATTCCCTCAAATTTTTTATGATAACCGAAATTGATGCTAACTTGCCAAGTGAGGAAGTGCACCGGAAAGTATGCGAGCGGACCTTATATTACCTCACGGAGGTATGTTAAGCGAGCC
OTU_79	MG775012	FN252819	73%, 92%	Gigasporaceae	Gigaspora margarita	0	0	0	0	0	0	0	0	0	0	0	0	0	0	0	0	0	0	0	0	0	3	0	4	3	0	0	3	6	0	0	0	0	0	0	5	0	2	0	TTTATGCACGCTCTAACCTTTTAACCAGTAATTAGATCACGGTCAGCATGCTATCCGTAACCCAACACCGATTAGAGATCAGGCGGCTAGCCCCGGAGGGTATCCGTTGCAATCCTCGACCCCAAACATCACATCTATCAAGGGCTATAACACTCCCGAAGGAGCCACATCCCTCCAGCCTTTTTATGACGTTCGAAATTGATGTTAACCAGCGGACACGAAAGTGCTCCATTTCACCAAGAGTTCACGCTTCGTGACGGTTTTGAGGCTCGCCACGCCATGTGATCTC
OTU_80	MG775013	AY639343	100%, 97%	Claroideoglomeraceae	Claroideoglomus claroideum	0	0	0	0	0	0	0	0	0	0	3	0	0	0	0	0	0	0	5	6	0	0	0	101	0	19	0	0	0	0	28	0	6	0	0	0	65	48	7	TTTGCTCACACTCTAACCTGTTCAAAGGCGGACCCTAACGACGTCAGCAAGCTGTCGTCACCAGGATGCCAATGAGAAGCCAGTTGGAACAGCCCTAAAGGTATTCGTTGCAATCCTCAATCCCGACCACCACATTCCGCTAAAGGTTATAACACTCCCGAAGGAGCCACATCCCTCCAGCCTTTTTATGACGATCGAAATTGATGTTAACCAGCGGACACGAAAGTGCTCCATTTCACCAAGAGTTCACGCTTCGCGACGGTTTTGAGGCTCGCCACGCCATGCGATC
OTU_81	MG775014	HE794050	100%, 99%	Gigasporaceae	Scutellospora sp.	0	0	0	0	0	0	0	0	0	0	0	0	0	0	0	0	0	0	0	0	2	0	2	4	0	0	5	0	0	0	0	1	0	0	0	4	1	0	0	TTTATGCTCGCTCTAACCTTTTGACCAACAATCAGATCATAGTCAGCGTGCTGTCTATAACCCAACATCGAATCAGAGGCCAGGCGGCTAGCCTAAAAAGGTATCCGTTGCAATCCTCGATCCCAAATATCACATTAATTAAGGGCTATAACACTCCCGAAAGAGCTACCTTCCCCCAATCATTTTATGACGTTCAAAATCGACGCTAACCTGCCAAGCGAAGAAGTGCACTTCAAGGTTAGGTTCAAAAAATCCCCCTTCCCCAAAGTTGATTCTCACCGGCATGACT
OTU_82	MG775015	JF717606	100%, 98%	Glomeraceae	Uncultured glomeraceae	0	0	0	0	0	0	0	0	0	0	0	0	0	0	0	0	0	0	0	0	0	1	0	0	0	0	0	0	0	4	0	0	0	0	5	1	2	5	0	TGTAATCACGTTCTAACCTTTTGACCGTCAACTTGAATGGCCGTACGCAAGCTTTCGACACCCAAGTAACTTTCAGAGGTCAGACGGATAGCCTAAAAGGTATTCGTTGCAATCCTCGGTCCTAATCACCACATTTACCAAAGGCTATAACACTTCAACCGAGGTCGAAGCTACATTCCTCCGGTCATTTTATGGCGATCAAAGCCGACGTTGACCTACCATACGAAAAAGTACACCTAAGAAATACGCATATTGCAAACAATGAAGATCTCATACGCCCACAAATGCA
OTU_83	MG775016	AJ459325	96%, 98%	Acaulosporaceae	Acaulospora sp.	0	0	0	0	0	0	0	0	0	1	0	0	0	0	0	0	0	1	0	0	0	0	0	0	0	0	0	0	0	0	0	0	0	8	0	0	0	0	0	TTTAACCCGTTCTAACCTTTTGACAATCGAGTCCCACTAACGTCAGCGAGCTGTCGAAAGCGGGGTAACCGTCAGAAGCCAGGTGACCAGCCACAAGGGTATCCGCTGCAATCCTCAATCCCGGTCACCACATAGATCAAGGTCTATAACACTTTTCCGAAGAAAAGCCACATTCCCTCAAATTTTTTATGATAACCGAAATTGATGCTAACCTGCCGAGTGAGGAAGTGCACCGGAAAGTACGCGAGCGAACCCACACACCATCAAGTTGATTCCCCACTAGCATGAC
OTU_84	MG775017	KP191471	98%, 98%	Acaulosporaceae	Acaulospora ignota	0	0	0	0	0	0	0	0	0	0	0	0	0	3	0	0	0	0	0	5	5	0	0	0	0	0	0	0	0	0	0	0	1	0	0	0	0	0	2	AATCAATCACTCTGACATCTAGACAATCGAGTCCCACTAACGTCAGCAAGCTGTCGGAAGCGGGGTAACCGCCAGAAGCCAGGTAATAAGCCACGAAGGTATCCGCTGCAATCCTCAATCCCGGTCACCACATAGATCGAGGTCTATAACACTTTCCCGAAGGAAAGCCACGTTCCCTCAAATTTTTTATGATAACCGAAATTGATGCTAACCTGCCAAGTAAGGAAGTGCACCAGAAAGTATGCGAGAGAACCCACACACCATCAAGTTGATTCCCCACTAGCATGAC
OTU_85	MG775018	HF968915	100%, 98%	Glomeraceae	Rhizophagus irregularis	0	0	0	0	0	0	0	0	0	0	0	3	3	0	0	0	0	0	0	0	0	2	1	0	0	0	0	0	0	0	0	0	1	0	1	0	0	0	0	TTTAACCCATTCTAACCTTTTGACCATCGACTTTGATAACCGTAAGCAAGCTTTCGGCACCAGAGCAACGATCAGAGACCAGAAAGGTAGCCCCGAAGGGTATCCGTTGCAATCCTCAATCTCGATCATCACATCTACCGAAGGCTATAACACTTCAATACGAGATCGAAACTACATTCCTCCAGTCATTTTATGACCACCAAAATTGATGTTAACCAACCACACGGGCAAGTACACCCAAGAGTACGAATATGCAAAAACATGAAGGTATTTAAGCTCCTCACACTCC
OTU_86	MG775019	KM879547	97%, 99%	Glomeraceae	Rhizophagus sp.	0	0	0	0	0	0	0	0	0	0	0	0	0	0	0	4	0	0	0	0	0	0	2	1	0	0	0	0	0	1	0	0	2	1	0	1	0	0	2	TTTAACCCGTTCTAACCTTTTGACCATCGACTTTGACAACCGTAAGCAAGCTTTCGGCACCAGAGCAACGATCAGAGACCAGACAGGTAGCCCCGAAGGGTATCCGTTGCAATCCTCAATCTCGATCATCACATCTACCGAAGGCTATAACACTTCAATACGAGATCGAAGCTACATTCCTCCAGTCATTTTATGACCACCAAAATTGATGTTAACCAACCATACGAGCAAGTACACCCAAGAGCACGAATATGCAAAACATGAAGGCGGTTAAGCTCCTCACGCCCCA
OTU_87	MG775020	FJ820862	100%, 97%	Glomeraceae	Uncultured glomeraceae	0	0	0	0	0	3	0	0	0	0	0	0	0	0	0	0	0	55	0	0	0	0	0	0	2	0	0	0	0	0	0	0	0	0	0	0	0	0	4	TTAATTCACATTCCAATCTATTTGCTCACTAATCCAAACAACAAAAGCAAGCTGTTGCTATCTGAACGTCAACAAGAGACCAGACGGAACTTCCCTAAAGGTATTCGTTGCAAACCTCAATCCCAATCGCCACATTCCGCTAAGGGTTATAACACTCCCGAAAGAGCCACATCCCCTTAACCTTTTTATGACAATCAAAATTGATGCTAACCAGCAGACAACAAAGTACACGGAAAACGAAAGCAATAAATTACGAACGATACCCGTTGAGTTGATGACTGCACGACTG
OTU_88	MG775021	HF970326	100%, 98%	Glomeraceae	Funneliformis mosseae	0	0	0	0	0	0	0	0	0	0	0	0	0	0	0	0	0	0	0	0	3	0	0	0	0	0	0	0	0	0	0	0	0	0	0	0	0	7	0	TCTAATCCGTTCTAACCTTTTGACCGTAATACCCTAACATCCTAAGCAAGCTTTCACCATCAAGGCAACTTATCAGAGATCAGCCGAATAGCCCTGAAGGGTCTCCGTTGCAATCCTCGGTCTCAAACATCACATCTACCAAAGGCTATAACACTTCAATACGAGATCGAAGCTACATTCCTCCAGTCATTTTATGACATTCAAAACCGATGTTGACTAACCGGACGAAAAAGTACACCAAGAGATCCCAATCCCGCGAATCTGAAGGCTTTGAAACTCTTCAAAACCC
OTU_89	MG775022	JF342363	100%, 98%	Acaulosporaceae	Entrophospora infrequens	0	0	0	0	0	0	0	0	0	0	0	0	0	0	0	0	0	0	0	0	0	0	0	0	0	0	0	2	0	0	4	0	0	6	0	0	2	2	0	TTTGCTCACACTCTAACCTGTTCAAAGGCGGATCCTAACAAAGTCAGCAAGCTGTCGTCACCAGGATGCCAATGAGAAGCCAGGTGGAGCAGCCCTAAAGGTATTCGTTGCAATCCTCAATCCCGACCACCACATTCCGCTAAAGGTTATAACACTCCCGAAGGAGCCACATCCCTCCAGCCTTTTTATGACGTTCGAAATTGATGTTAACCAGCGGACACGAAAGTGCTCCCCCTCATCGTGAGACACATGCTGTGGCGGTTTTGAGGCTCGCCACAACATGTGTATC
OTU_90	MG775023	HE775332	97%, 94%	Glomeraceae	Uncultured glomeraceae	0	0	0	0	0	0	0	0	0	0	0	0	0	0	0	0	0	0	0	0	0	0	0	0	0	0	2	0	2	0	0	0	2	0	0	0	0	4	0	TTTAACCCGCTCTAACCTATTGACCGTCAACTTAAATGGCCGTAAGCACGCTTTCGGCACCTAAGTAACTTTCAGAGGTCAGACGGATAGCCCAAAAGGTATCCGTTGCAATCCTCAATATCGATCACCACATCTACCAAAGGCTATAACACTTCAATACGAGATCAAAGCTACATTCCTCCGGTCATTTTATAGCGACCAAAACTGACGTTGGCCTACCATACGAAAAAGTACACCCAAAAAGCACAAACATTGCAAACAGCGAGGGTTTAAAGCTCACACACGCCCA
OTU_91	MG775024	AY953107	100%, 98%	Claroideoglomeraceae	Claroideoglomus claroideum	0	0	0	0	0	0	0	0	0	0	0	0	0	0	0	0	0	0	0	0	0	0	0	0	0	0	0	6	1	0	0	0	0	10	0	1	0	2	0	TTTGCTCACACTCTAGCCTGTTCAAAGGCGGATCCTAACGACGTCAGCAAGCTGTCGTCACCAGGATACCAATGAGAAGCCAGGTGGAACAGCCCTAAAGGTATTCGTTGCAACCCTCAATCCCGAACACCACATTCCGCTAAAGGTTATAACACTCCCGAAGGAGCCACATCCCTCCAGCCTTTTTATGACGTTCGAAATTGATGTTAACCAGCGGACACGAAAGTGCTCCATTTCACCAAGAGTTCACGCTTCGGGACGGTTTTGAAGCTCGCCACGTCATGTGATC
OTU_92	MG775025	KF206467	100%, 99%	Acaulosporaceae	Acaulospora sp.	0	0	0	0	0	0	0	0	0	0	0	0	0	0	0	0	0	0	0	0	0	0	0	0	0	3	1	0	2	1	1	0	1	0	0	0	0	0	1	AATCAATCACTCCGACATCTAGACAATCGAATCCCACCGACGTTAGCGAGCTATCGCAGGCGGGGCAACCGTCAGAAGCCAGGTGACGAGCCACGAGGGTATCCGCTGCAATCCTCAATCCCGGTCACCACATAGATCGAGATCTATAACACTTTTCCGAAGAAAAGCCACATTCTCTCAAATTTTTTATGATAACCGAAATTGATGCTAACCTGCCGGGTGAGAAAGTGCACCTGAAAGTACGAGGGAAAACCCACACACCATCAGGTTGATTCCTCACTAGCAGGAC
Legend
Soil_4	Soil after O. compressus			TOTAL # sequences	238163	%
Soil_5	Soil after O. compressus			Glomeraceae	156225	65.5958
Soil_6	Soil after O. compressus			Claroideoglomeraceae	69094	29.0112
Soil_10	Soil after L. rigidum			Acaulosporaceae	12337	5.18007
Soil_11	Soil after L. rigidum			Gigasporaceae	415	0.17425
Soil_12	Soil after L. rigidum			Archaeosporaceae	77	0.0323308
Soil_16	Soil after O. compressus + L. rigidum			Paraglomeraceae	15	0.00629821
Soil_17	Soil after O. compressus + L. rigidum
Soil_18	Soil after O. compressus + L. rigidum			TOTAL # Glomeraceae	Uncultured Glomeraceae	Rhizophagus	Funneliformis	Dominikia
Orn_4	O. compressus			55	33	17	4	1
Orn_5	O. compressus			%	60	30.9091	7.27273	1.81818
Orn_6	O. compressus
Lol_10	L. rigidum
Lol_11	L. rigidum
Lol_12	L. rigidum
Lol_16	L. rigidum (from mixture with O. compressus)
Lol_17	L. rigidum (from mixture with O. compressus)
Lol_18	L. rigidum (from mixture with O. compressus)
Orn_16	O. compressus (from mixture with L. rigidum)
Orn_17	O. compressus (from mixture with L. rigidum)
Orn_18	O. compressus (from mixture with L. rigidum)
W_1	Wheat after O. compressus undisturbed
W_2	Wheat after O. compressus undisturbed
W_3	Wheat after O. compressus undisturbed
W_4	Wheat after O. compressus disturbed
W_5	Wheat after O. compressus disturbed
W_6	Wheat after O. compressus disturbed
W_7	Wheat after L. rigidum undisturbed
W_8	Wheat after L. rigidum undisturbed
W_9	Wheat after L. rigidum undisturbed
W_10	Wheat after L. rigidum disturbed
W_11	Wheat after L. rigidum disturbed
W_12	Wheat after L. rigidum disturbed
W_13	Wheat after O. compressus + L. rigidum undisturbed
W_14	Wheat after O. compressus + L. rigidum undisturbed
W_15	Wheat after O. compressus + L. rigidum undisturbed
W_16	Wheat after O. compressus + L. rigidum disturbed
W_17	Wheat after O. compressus + L. rigidum disturbed
W_18	Wheat after O. compressus + L. rigidum disturbed
